# Supplementary material
Source: PubMed Central journal article supplement (PMC4818659)
Supplement: NIHMS756212-supplement-2.pdf [file NIHMS756212-supplement-2.pdf]

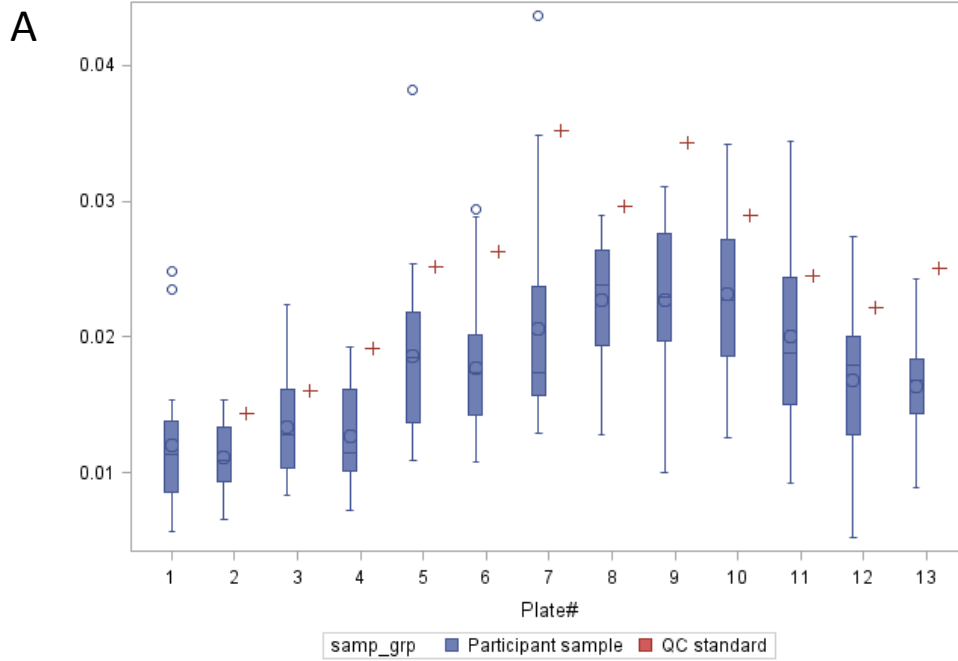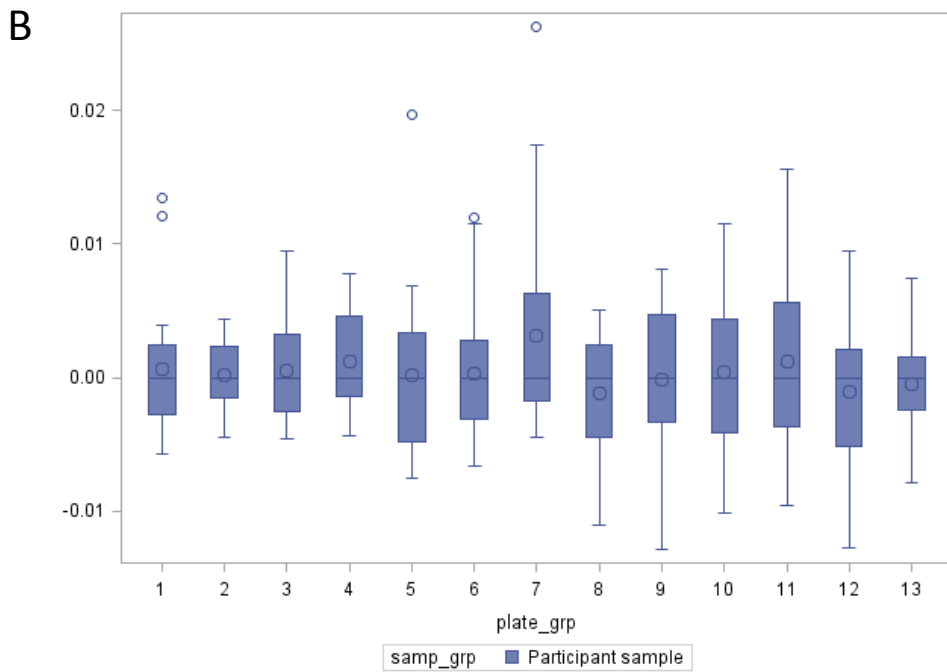

**Supplementary Figure 1. Batch effects in the discovery set and their correction.** Box-whisker plots of the integrals for glycan Hex<sub>5</sub>HexNAC<sub>4</sub>Fuc<sub>1</sub> by batch number prior to batch corrections (A) and after batch corrections (B). Intensity signals of the standard QC samples included in the batches are also depicted in (A).
