# Supplementary material
Source: PubMed Central journal article supplement (PMC4818659)
Supplement: NIHMS756212-supplement-3.pdf [file NIHMS756212-supplement-3.pdf]

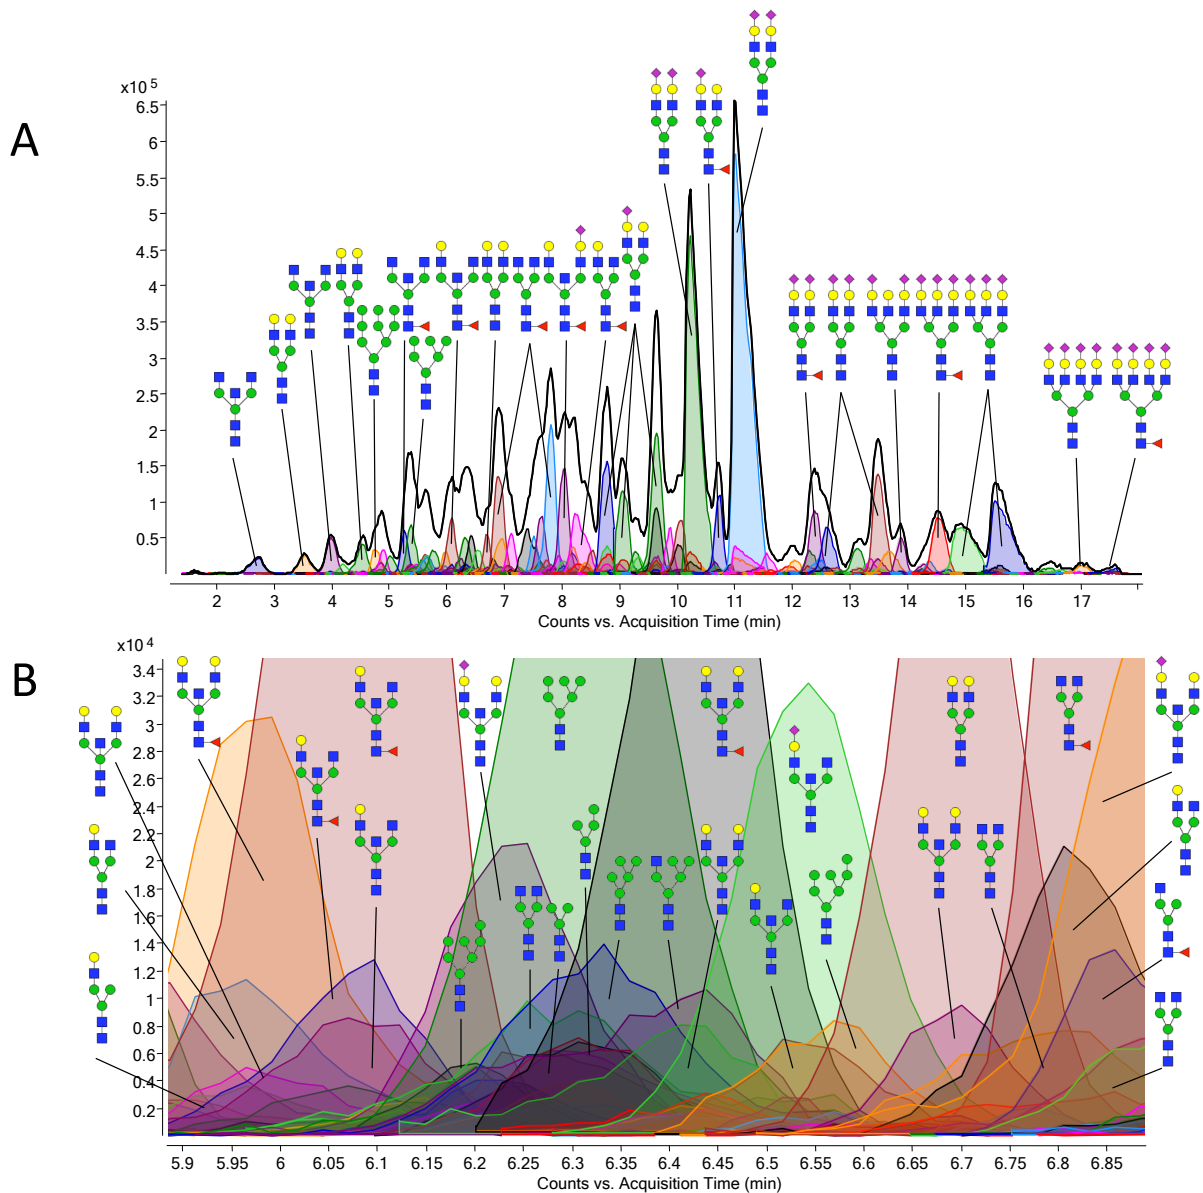

**Supplementary Figure 2. Typical chromatogram of N-glycans obtained from human serum.** Extracted glycan chromatogram as obtained from one of the samples analyzed (A). Enlargement of the same chromatogram showing signals eluting between 5.9 and 6.9 minutes (B). In both windows, the higher abundance glycans have been annotated with their respective putative structures. Symbol key: blue square is N-acetylglucosamine, green ball is mannose, yellow ball is galactose, red triangle is fucose and purple diamond is N-acetylneuraminic acid.
