# Supplementary material
Source: PubMed Central journal article supplement (PMC4818659)
Supplement: NIHMS756212-supplement-4.pdf [file NIHMS756212-supplement-4.pdf]

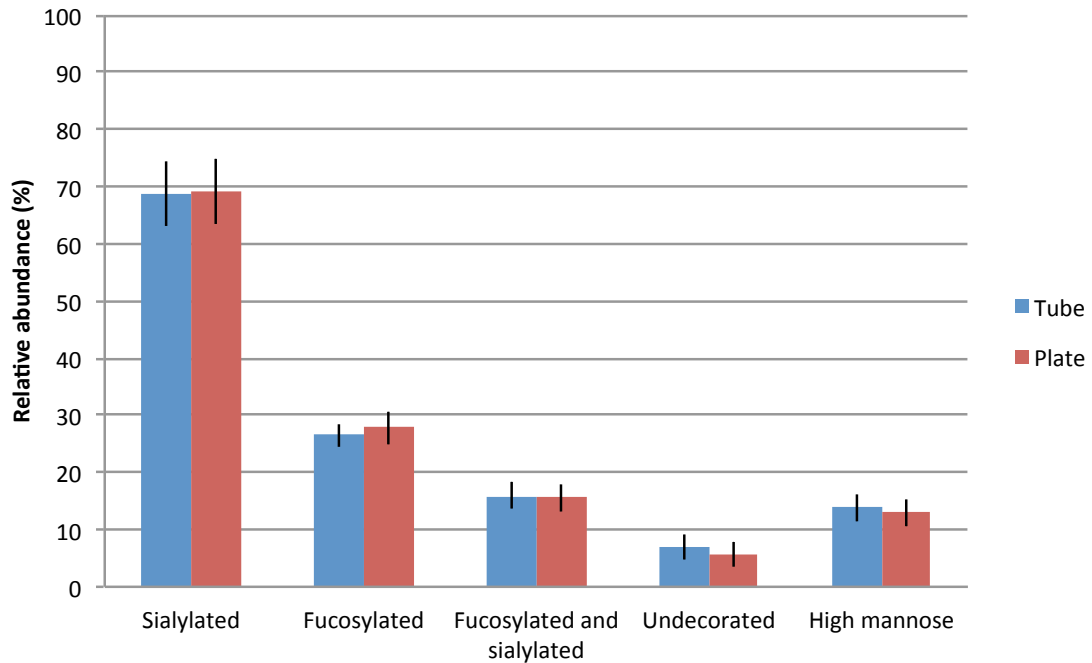

**Supplementary Figure 3. Comparison of tube-based sample preparation method used in the discovery set and the plate-based method used in the testing set.** Average relative abundances (n=8) of five glycan groups are depicted for the tube-based method (blue) and the plate-based method (red). Error bars represent standard deviations. No difference is observed between the two methods, indicating that the results of the two methods are directly comparable.
