# Supplementary material
Source: PubMed Central journal article supplement (PMC4818659)
Supplement: NIHMS756212-supplement-5.pdf [file NIHMS756212-supplement-5.pdf]

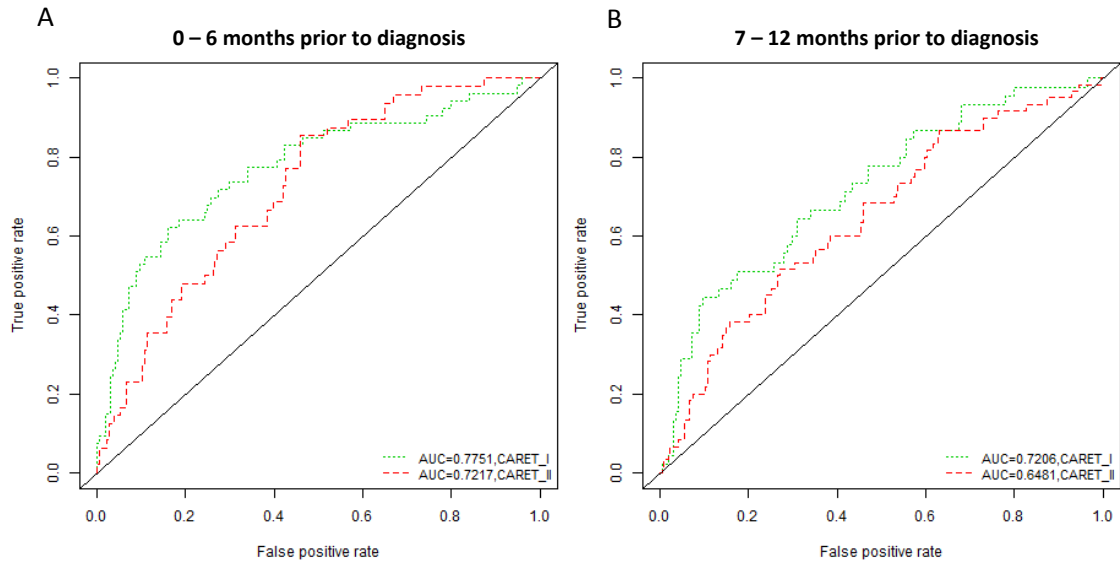

**Supplementary Figure 4** Receiver operator curves for the glycan combination marker panel stratified by time to diagnosis. (A) 0-6 months prior to diagnosis, and (B) 7-12 months prior to diagnosis. The green dotted line indicates the curve for the discovery set (CARET I), while the red line indicates the test set (CARET II).
