# Supplementary material
Source: PubMed Central journal article supplement (PMC4818659)
Supplement: NIHMS756212-supplement-6.pdf [file NIHMS756212-supplement-6.pdf]

|    | <b>Glycan feature</b> | <b>formula</b>                                                                                                                                                           |
|----|-----------------------|--------------------------------------------------------------------------------------------------------------------------------------------------------------------------|
| 1  | HM                    | $=H_8N_2F_0S_0+H_9N_2F_0S_0$                                                                                                                                             |
| 2  | Hyb                   | $=H_6N_3F_0S_0+H_6N_3F_1S_0+H_6N_4F_0S_0$                                                                                                                                |
| 3  | Tr                    | $=H_3N_3F_0S_0+H_3N_3F_1S_0+H_3N_4F_0S_0+H_3N_4F_1S_0+H_3N_5F_0S_0+H_3N_5F_1S_0$                                                                                         |
| 4  | BA                    | $=H_5N_4F_0S_0+H_5N_4F_1S_0+H_5N_4F_1S_1+H_5N_4F_2S_2$                                                                                                                   |
| 5  | Fuc_1                 | $=(H_3N_3F_1S_0+H_3N_4F_1S_0+H_3N_5F_1S_0+H_4N_3F_1S_0+H_5N_4F_1S_0+H_6N_3F_1S_0)/$<br>$(H_3N_3F_0S_0+H_3N_4F_0S_0+H_3N_5F_0S_0+H_4N_3F_0S_0+H_5N_4F_0S_0+H_6N_3F_0S_0)$ |
| 6  | Fuc_2                 | $=H_3N_3F_1S_0/ H_3N_3F_0S_0$                                                                                                                                            |
| 7  | Fuc_3                 | $= H_3N_4F_1S_0/ H_3N_4F_0S_0$                                                                                                                                           |
| 8  | Fuc_4                 | $= H_3N_5F_1S_0/ H_3N_5F_0S_0$                                                                                                                                           |
| 9  | Fuc_5                 | $= H_4N_3F_1S_0/ H_4N_3F_0S_0$                                                                                                                                           |
| 10 | Fuc_6                 | $= H_5N_4F_1S_0/ H_5N_4F_0S_0$                                                                                                                                           |
| 11 | Fuc_7                 | $=H_6N_3F_1S_0/ H_6N_3F_0S_0$                                                                                                                                            |
| 12 | Gal_1                 | $=(H_5N_4F_0S_0+H_5N_4F_1S_0+H_4N_3F_0S_0+H_4N_3F_1S_0)/(H_3N_4F_0S_0+H_3N_4F_1S_0+H_3N_3F_0S_0+H_3N_3F_1S_0)$                                                           |
| 13 | Gal_2                 | $=H_5N_4F_0S_0/H_3N_4F_0S_0$                                                                                                                                             |
| 14 | Gal_3                 | $=H_5N_4F_1S_0/H_3N_4F_1S_0$                                                                                                                                             |
| 15 | Gal_4                 | $=H_4N_3F_0S_0/H_3N_3F_0S_0$                                                                                                                                             |
| 16 | Gal_5                 | $=H_4N_3F_1S_0/H_3N_3F_1S_0$                                                                                                                                             |
| 17 | Sia_1                 | $=(H_6N_5F_1S_3+H_6N_5F_1S_2+H_6N_5F_1S_1)/H_6N_5F_1S_0$                                                                                                                 |
| 18 | Sia_2                 | $=(H_6N_5F_1S_3+H_6N_5F_1S_2)/(H_6N_5F_1S_1+H_6N_5F_1S_0)$                                                                                                               |

**Supplementary Table 1.** Formulas used to calculate additional glycan feature data.
