# Supplementary material
Source: PubMed Central journal article supplement (PMC4818659)
Supplement: NIHMS756212-supplement-7.pdf [file NIHMS756212-supplement-7.pdf]

| Glycan composition                                          | direction of association in cases | AUC   | Adjusted p-value | FDR   |
|-------------------------------------------------------------|-----------------------------------|-------|------------------|-------|
| H <sub>6</sub> N <sub>3</sub> F <sub>1</sub> S <sub>0</sub> | Decreased                         | 0.688 | <0.001           | 0.000 |
| H <sub>6</sub> N <sub>5</sub> F <sub>1</sub> S <sub>0</sub> | Decreased                         | 0.639 | <0.001           | 0.003 |
| H <sub>5</sub> N <sub>4</sub> F <sub>1</sub> S <sub>0</sub> | Decreased                         | 0.629 | <0.001           | 0.007 |
| H <sub>3</sub> N <sub>4</sub> F <sub>1</sub> S <sub>0</sub> | Increased                         | 0.624 | <0.001           | 0.009 |
| H <sub>3</sub> N <sub>4</sub> F <sub>0</sub> S <sub>0</sub> | Increased                         | 0.604 | 0.006            | 0.062 |
| H <sub>6</sub> N <sub>6</sub> F <sub>1</sub> S <sub>1</sub> | Decreased                         | 0.596 | 0.010            | 0.102 |
| H <sub>3</sub> N <sub>3</sub> F <sub>0</sub> S <sub>0</sub> | Increased                         | 0.594 | 0.010            | 0.111 |
| H <sub>6</sub> N <sub>5</sub> F <sub>1</sub> S <sub>1</sub> | Decreased                         | 0.594 | 0.004            | 0.099 |
| H <sub>3</sub> N <sub>5</sub> F <sub>1</sub> S <sub>0</sub> | Increased                         | 0.592 | 0.003            | 0.101 |
| H <sub>6</sub> N <sub>5</sub> F <sub>1</sub> S <sub>3</sub> | Increased                         | 0.591 | 0.003            | 0.098 |
| H <sub>3</sub> N <sub>3</sub> F <sub>1</sub> S <sub>0</sub> | Increased                         | 0.590 | 0.002            | 0.096 |
| H <sub>7</sub> N <sub>6</sub> F <sub>1</sub> F <sub>1</sub> | Increased                         | 0.588 | 0.002            | 0.106 |
| H <sub>4</sub> N <sub>3</sub> F <sub>0</sub> S <sub>0</sub> | Decreased                         | 0.587 | 0.003            | 0.108 |
| H <sub>5</sub> N <sub>4</sub> F <sub>2</sub> S <sub>2</sub> | Increased                         | 0.586 | 0.002            | 0.110 |
| H <sub>6</sub> N <sub>3</sub> F <sub>0</sub> S <sub>0</sub> | Decreased                         | 0.580 | 0.002            | 0.141 |
| H <sub>4</sub> N <sub>3</sub> F <sub>1</sub> S <sub>0</sub> | Decreased                         | 0.578 | 0.001            | 0.149 |
| H <sub>5</sub> N <sub>4</sub> F <sub>0</sub> S <sub>0</sub> | Decreased                         | 0.577 | 0.001            | 0.155 |
| H <sub>6</sub> N <sub>5</sub> F <sub>1</sub> S <sub>2</sub> | Increased                         | 0.570 | 0.007            | 0.251 |
| H <sub>6</sub> N <sub>5</sub> F <sub>0</sub> S <sub>2</sub> | Decreased                         | 0.568 | 0.007            | 0.258 |
| H <sub>7</sub> N <sub>7</sub> F <sub>2</sub> S <sub>3</sub> | Increased                         | 0.567 | 0.004            | 0.257 |
| H <sub>9</sub> N <sub>2</sub> F <sub>0</sub> S <sub>0</sub> | Decreased                         | 0.567 | 0.004            | 0.250 |
| H <sub>3</sub> N <sub>5</sub> F <sub>0</sub> S <sub>0</sub> | Increased                         | 0.565 | 0.004            | 0.278 |
| H <sub>5</sub> N <sub>4</sub> F <sub>1</sub> S <sub>1</sub> | Decreased                         | 0.562 | 0.004            | 0.321 |
| H <sub>6</sub> N <sub>5</sub> F <sub>2</sub> S <sub>3</sub> | Increased                         | 0.558 | 0.005            | 0.363 |
| H <sub>4</sub> N <sub>3</sub> F <sub>2</sub> S <sub>0</sub> | Increased                         | 0.555 | 0.012            | 0.427 |
| H <sub>6</sub> N <sub>6</sub> F <sub>3</sub> S <sub>1</sub> | Increased                         | 0.555 | 0.010            | 0.418 |
| H <sub>3</sub> N <sub>7</sub> F <sub>1</sub> S <sub>0</sub> | Decreased                         | 0.554 | 0.008            | 0.423 |
| H <sub>5</sub> N <sub>5</sub> F <sub>2</sub> S <sub>1</sub> | Decreased                         | 0.553 | 0.007            | 0.447 |
| H <sub>7</sub> N <sub>6</sub> F <sub>0</sub> S <sub>4</sub> | Decreased                         | 0.552 | 0.011            | 0.464 |
| H <sub>5</sub> N <sub>5</sub> F <sub>3</sub> S <sub>1</sub> | Decreased                         | 0.551 | 0.008            | 0.461 |
| H <sub>8</sub> N <sub>2</sub> F <sub>0</sub> S <sub>0</sub> | Decreased                         | 0.551 | 0.008            | 0.466 |
| H <sub>6</sub> N <sub>4</sub> F <sub>0</sub> S <sub>0</sub> | Decreased                         | 0.551 | 0.007            | 0.457 |
| H <sub>5</sub> N <sub>5</sub> F <sub>0</sub> S <sub>1</sub> | Decreased                         | 0.550 | 0.006            | 0.451 |

**Supplementary Table 2** Glycans that were identified to be significantly different between NSCLC cases and controls at AUC>0.55 and FDR<0.5.
