# Supplementary material
Source: PubMed Central journal article supplement (PMC4818659)
Supplement: NIHMS756212-supplement-8.pdf [file NIHMS756212-supplement-8.pdf]

| marker                                       | Beta Coefficient | SE   | p-value |
|----------------------------------------------|------------------|------|---------|
| N <sub>5</sub> H <sub>4</sub> F <sub>1</sub> | -1.11            | 0.49 | 0.023   |
| N <sub>6</sub> H <sub>5</sub> F <sub>1</sub> | -1.20            | 0.53 | 0.024   |
| Gal_4                                        | -2.02            | 0.49 | 0.000   |
| Sia_2                                        | 1.19             | 0.53 | 0.025   |

**Supplementary Table 3.** Coefficients, standard error and p-value of the glycan variables in the combination marker model.
