# Supplementary material
Source: PubMed Central journal article supplement (PMC4818659)
Supplement: NIHMS756212-supplement-9.pdf [file NIHMS756212-supplement-9.pdf]

| <b>ROC Model</b>                                   | <b>AUC</b> | <b>95% CI</b> |       | <b>Max Sensitivity @ 90% Specificity</b> |
|----------------------------------------------------|------------|---------------|-------|------------------------------------------|
| <b>Risk factors</b>                                | 0.607      | 0.540         | 0.673 | 0.327                                    |
| <b>Glycan marker panel</b>                         | 0.672      | 0.612         | 0.733 | 0.367                                    |
| <b>Risk factors +pro-SFTPb</b>                     | 0.733      | 0.675         | 0.792 | 0.265                                    |
| <b>Glycan marker panel+Risk factors +pro-SFTPb</b> | 0.768      | 0.713         | 0.823 | 0.408                                    |

**Supplementary Table 4** Predictive values of risk factors, pro-SFTPb and the glycan marker panel in the discovery set.
